# Supplementary material for: Polyimide (PI) high-quality polymer dielectric films with the features of anti-solvents and large-area consistency for field-effect transistors
Source: Royal Society of Chemistry journal article supplement (doi:10.1039/c5ra17382e), 2015-01-01
Supplement: c5ra17382e1.pdf [file c5ra17382e1.pdf]

**Title:**

**Polyimide (PI): High-Quality Polymer Dielectric Film with the Features of Anti-Solvents, Large-Area Consistency for Field-Effect Transistors**

**Authors:**

Yunze Li<sup>1\*</sup>, Deyang Ji<sup>2\*</sup>, Huanli Dong<sup>2</sup>, Jingze Li<sup>1</sup>, Wenping Hu<sup>2</sup>

**Affiliations:**

<sup>1</sup>State Key Laboratory of Electronic Thin Films and Integrated Devices, School of Microelectronics and Solid-State Electronics, University of Electronic Science and Technology of China, Chengdu 610054, China

<sup>2</sup>Beijing National Laboratory for Molecular Sciences, Key Laboratory of Organic Solids, Institute of Chemistry, Chinese Academy of Sciences, Beijing 100190, China

Correspondence and requests for materials should be addressed to J.L. (lijingze@uestc.edu.cn) and W.H. (huwp@iccas.ac.cn).

\* These authors contributed equally to this work.

## Supporting-1

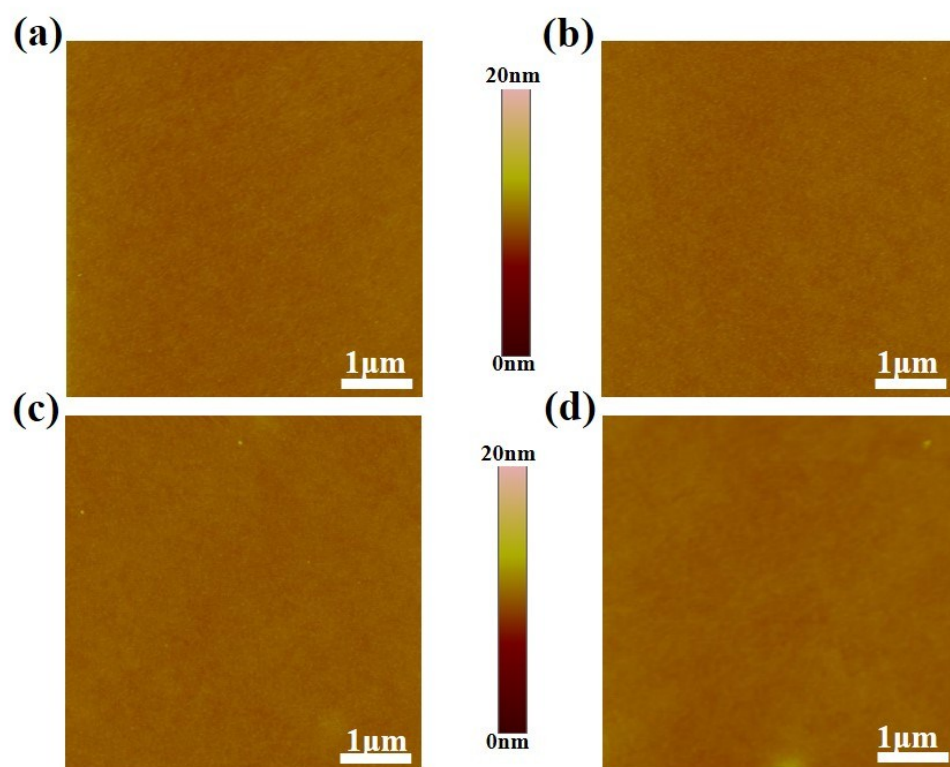

**Fig. S1:** AFM of images of the PI films that fabricated at (a) 2000 rpm, 30s. (b) 4000rpm, 30s. (c) 6000 rpm, 30s, (d) 8000 rpm, 30s, showing the smooth morphology of the PI films.

## Supporting-2

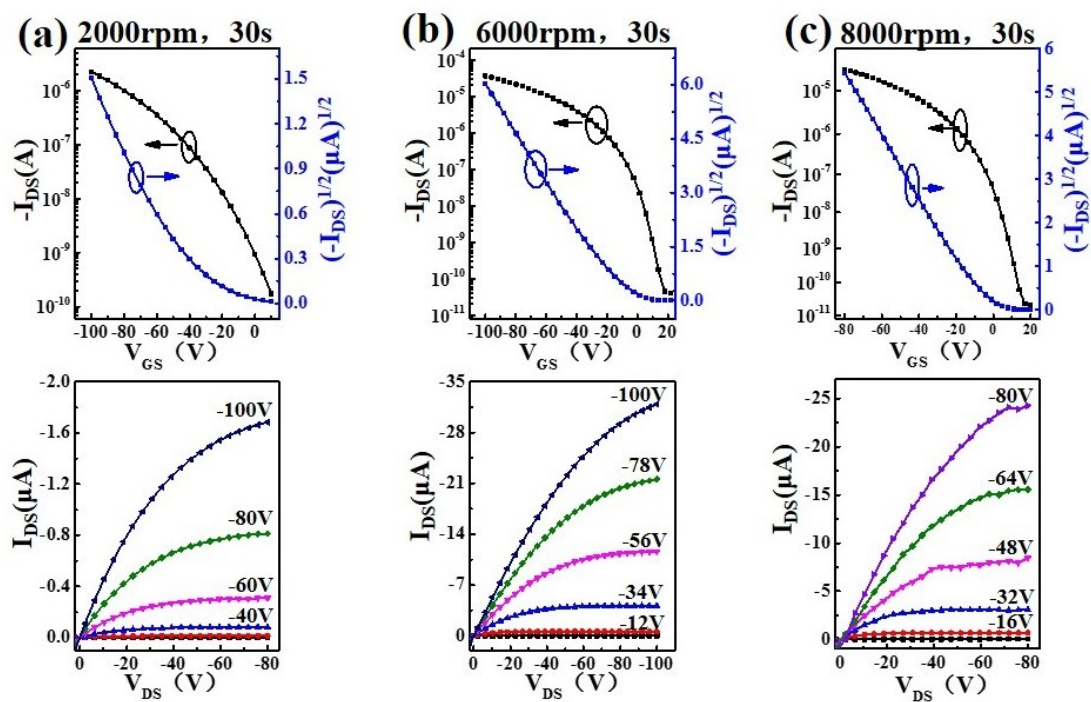

**Fig. S2:** The transfer and output characteristics of a typical OFET fabricated on the PI films that prepared at different conditions respectively (a) 2000 rpm, 30s. (b) 6000 rpm, 30s. (c) 8000rpm, 30s.

### Supporting-3

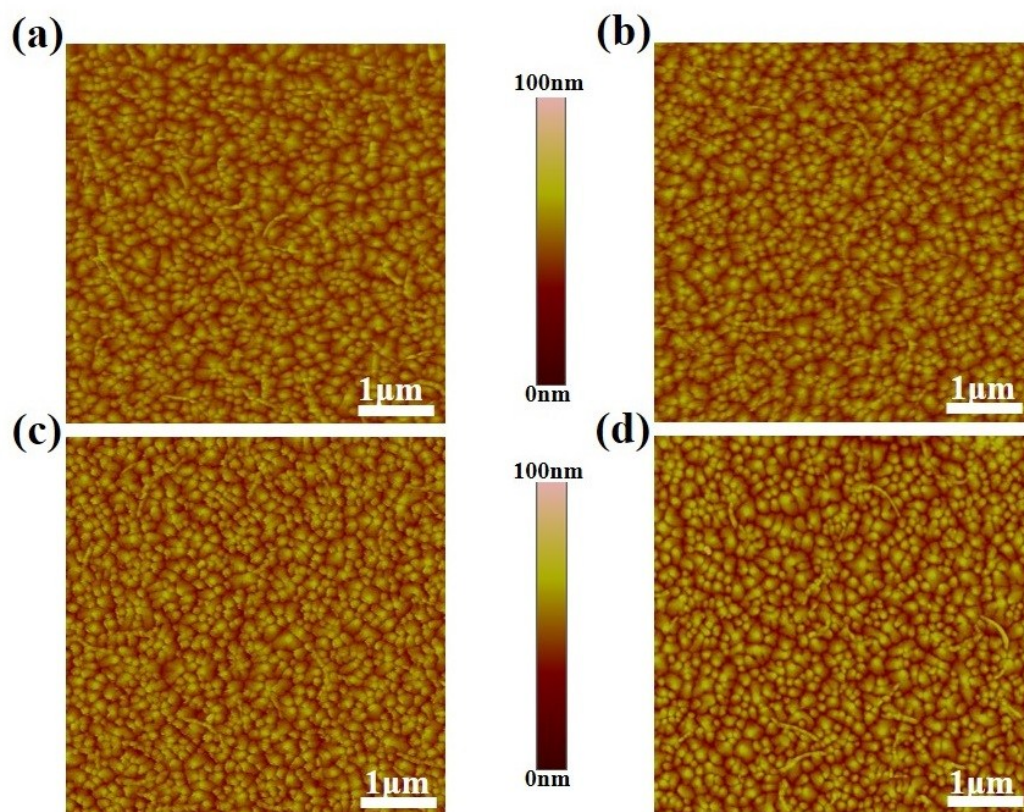

**Fig. S3:** AFM images of the pentacene prepared on the PI films that fabricated at different conditions respectively (a) 2000 rpm, 30s. (b) 4000 rpm, 30s. (c) 6000rpm, 30s. (d) 8000 rpm, 30s.

## Supporting-4

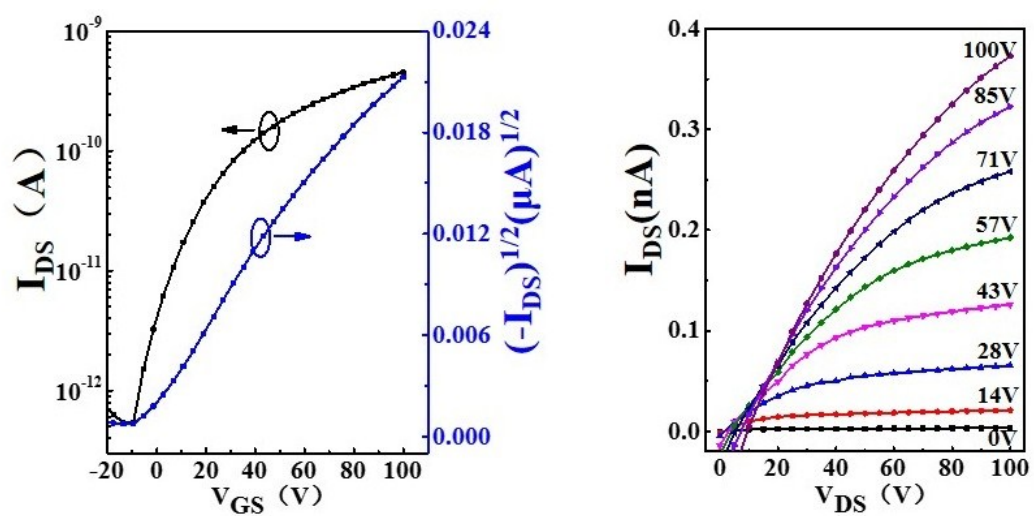

**Fig. S4:** The transfer and output characteristics of the n-channel OFET based on PDI-CN<sub>2</sub>

## Supporting-5

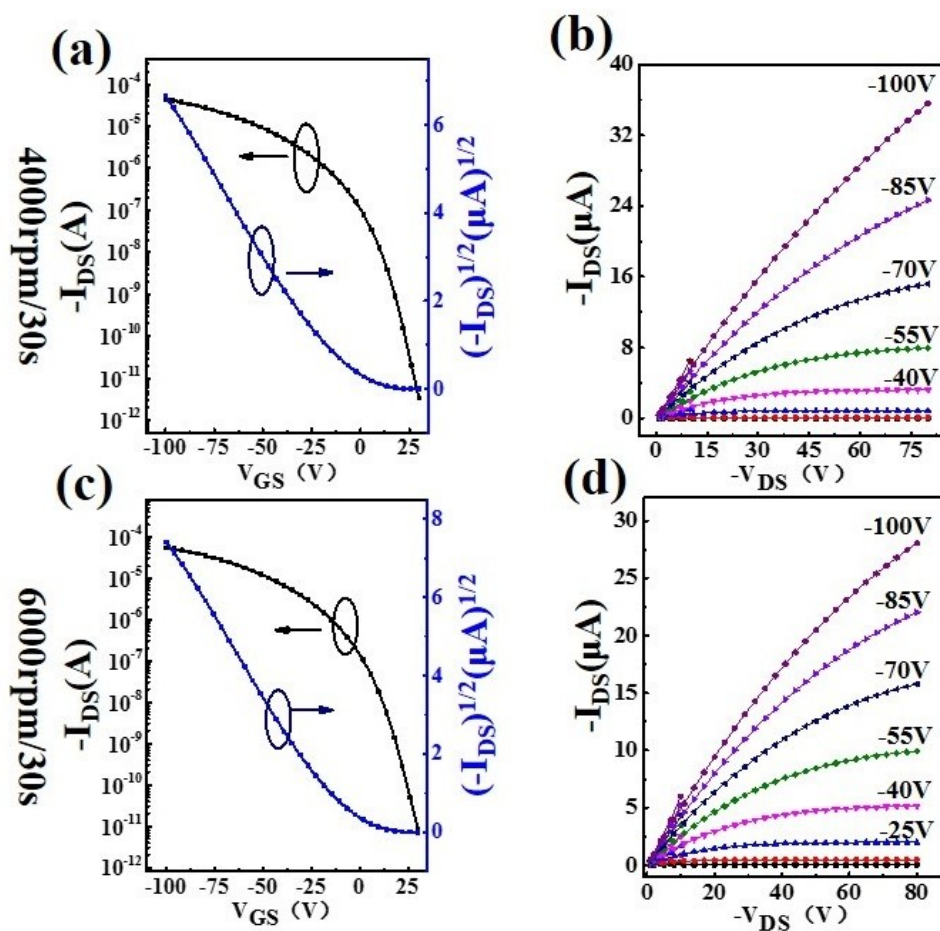

**Fig. S5:** (a) Transfer (b) Output characteristics of a typical device fabricated the PI film that prepared at 4000 rpm, 30s and dealt with solvents. (c) Transfer (d) Output characteristics of a typical device fabricated the PI film that prepared at 6000 rpm, 30s and dealt with solvents.
